# Supplementary material
Source: HighWire-hosted journal article supplement (https://tech.snmjournals.org/highwire/filestream/8647/field_highwire_adjunct_files/0/148650_Supplemental_Data.pdf)
Supplement: 148650_Supplemental_Data.pdf [file 148650_Supplemental_Data.pdf]

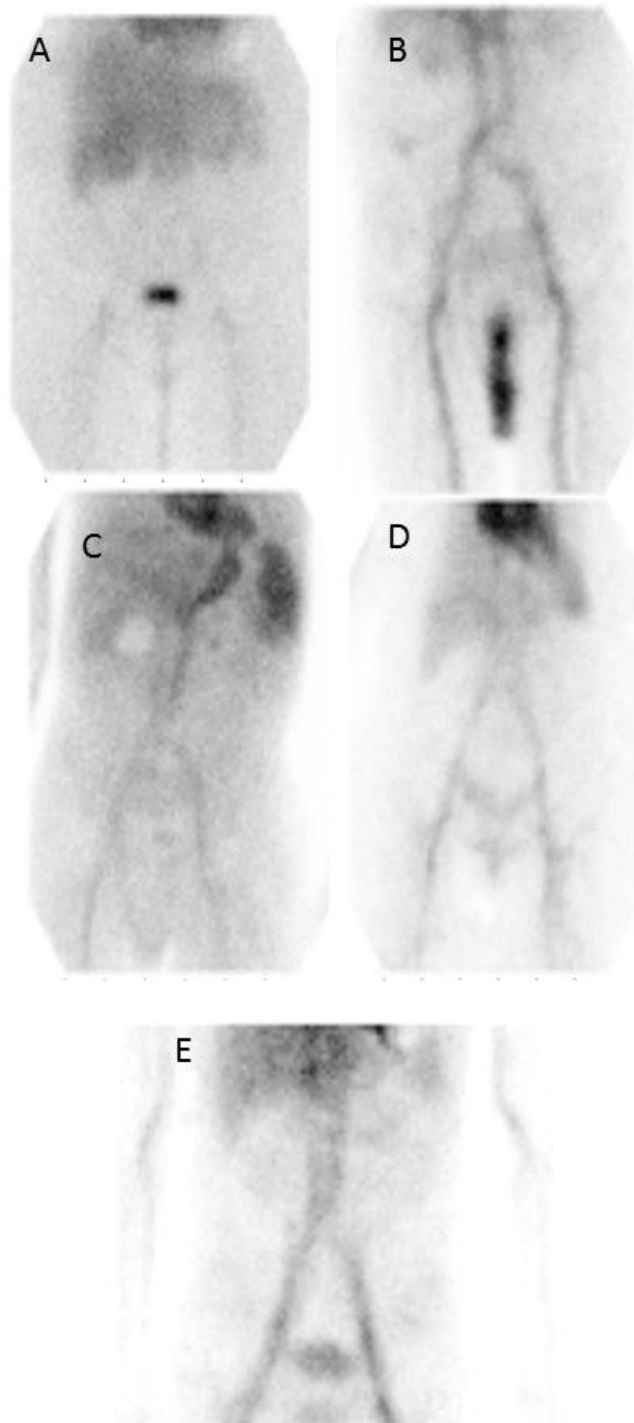

**SUPPLEMENTAL FIGURE 1.** Anterior abdominal planar  $^{99m}\text{Tc}$ -RBC images of patients with gastrointestinal bleeding indications using in vivo (A and C) and in vitro (B–E) procedures with pyrophosphate (A and B), gluceptate (C and D), and UltraTag (E) at 1 h after injection.
